# Supplementary material for: The 8 Å crystal structure and new crystal chemical data of rouxelite from the Monte Arsiccio mine, Apuan Alps, Italy
Source: Copernicus journal article supplement (doi:10.5194/ejm-37-591-2025), 2025-09-08

## checkCIF/PLATON report

Structure factors have been supplied for datablock(s) rouxelite\_full\_o

THIS REPORT IS FOR GUIDANCE ONLY. IF USED AS PART OF A REVIEW PROCEDURE FOR PUBLICATION, IT SHOULD NOT REPLACE THE EXPERTISE OF AN EXPERIENCED CRYSTALLOGRAPHIC REFEREE.

No syntax errors found.      CIF dictionary      Interpreting this report

### Datablock: rouxelite\_full\_o

---

|                                     |                                                                                                                                                                               |                                                                                                                                                                              |
|-------------------------------------|-------------------------------------------------------------------------------------------------------------------------------------------------------------------------------|------------------------------------------------------------------------------------------------------------------------------------------------------------------------------|
| Bond precision:                     | Cu- S = 0.0106 Å                                                                                                                                                              | Wavelength=0.71073                                                                                                                                                           |
| Cell:                               | a=43.1883 (12)      b=8.1037 (2)      c=38.147 (1)                                                                                                                            |                                                                                                                                                                              |
|                                     | alpha=96.001 (2)      beta=116.615 (2)      gamma=95.372 (2)                                                                                                                  |                                                                                                                                                                              |
| Temperature:                        | 295 K                                                                                                                                                                         |                                                                                                                                                                              |
|                                     | Calculated                                                                                                                                                                    | Reported                                                                                                                                                                     |
| Volume                              | 11721.7 (6)                                                                                                                                                                   | 11721.7 (6)                                                                                                                                                                  |
| Space group                         | C -1                                                                                                                                                                          | C -1                                                                                                                                                                         |
| Hall group                          | -C 1                                                                                                                                                                          | -C 1                                                                                                                                                                         |
| Moiety formula                      | Ag <sub>2.10</sub> As <sub>1.45</sub> Cu <sub>8</sub> Hg <sub>3.06</sub><br>O <sub>2.52</sub> Pb <sub>83.55</sub> S <sub>261.48</sub><br>Sb <sub>111.84</sub> Tl <sub>2</sub> | ?                                                                                                                                                                            |
| Sum formula                         | Ag <sub>2.10</sub> As <sub>1.45</sub> Cu <sub>8</sub> Hg <sub>3.06</sub><br>O <sub>2.52</sub> Pb <sub>83.55</sub> S <sub>261.48</sub><br>Sb <sub>111.84</sub> Tl <sub>2</sub> | Ag <sub>0.50</sub> As <sub>0.53</sub> Cu <sub>2</sub> Hg <sub>0.75</sub> O <sub>0</sub><br>Pb <sub>21.23</sub> S <sub>65.43</sub> Sb <sub>27.49</sub><br>Tl <sub>10.50</sub> |
| Mr                                  | 41217.98                                                                                                                                                                      | 10317.25                                                                                                                                                                     |
| D <sub>x</sub> , g cm <sup>-3</sup> | 5.839                                                                                                                                                                         | 5.846                                                                                                                                                                        |
| Z                                   | 1                                                                                                                                                                             | 4                                                                                                                                                                            |
| Mu (mm <sup>-1</sup> )              | 39.590                                                                                                                                                                        | 40.004                                                                                                                                                                       |
| F <sub>000</sub>                    | 17543.9                                                                                                                                                                       | 17558.0                                                                                                                                                                      |
| F <sub>000</sub> '                  | 17246.12                                                                                                                                                                      |                                                                                                                                                                              |
| h, k, l <sub>max</sub>              | 64, 12, 57                                                                                                                                                                    | 64, 12, 57                                                                                                                                                                   |
| N <sub>ref</sub>                    | 41276                                                                                                                                                                         | 55765                                                                                                                                                                        |
| T <sub>min</sub> , T <sub>max</sub> | 0.246, 0.670                                                                                                                                                                  | 0.057, 0.069                                                                                                                                                                 |
| T <sub>min</sub> '                  | 0.087                                                                                                                                                                         |                                                                                                                                                                              |

Correction method= # Reported T Limits: T<sub>min</sub>=0.057 T<sub>max</sub>=0.069  
AbsCorr = MULTI-SCAN

Data completeness= 1.351

Theta (max)= 32.173

R(reflections)= 0.0854( 17982)

wR2(reflections)=  
0.2755( 55765)

S = 0.951

Npar= 1131

---

The following ALERTS were generated. Each ALERT has the format  
**test-name\_ALERT\_alert-type\_alert-level.**  
Click on the hyperlinks for more details of the test.

---

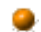

#### Alert level B

PLAT213\_ALERT\_2\_B Atom S51 has ADP max/min Ratio ..... 4.2 oblate

**Author Response: This is a disordered S atom which we couldn't properly refine as split position.**

PLAT213\_ALERT\_2\_B Atom S53 has ADP max/min Ratio ..... 4.2 oblate

**Author Response: This is a disordered S atom which we couldn't properly refine as split position.**

PLAT213\_ALERT\_2\_B Atom S65 has ADP max/min Ratio ..... 4.2 prolat

**Author Response: This is a disordered S atom which we couldn't properly refine as split position.**

PLAT213\_ALERT\_2\_B Atom S66 has ADP max/min Ratio ..... 4.2 prolat

**Author Response: This is a disordered S atom which we couldn't properly refine as split position.**

PLAT213\_ALERT\_2\_B Atom S51' has ADP max/min Ratio ..... 4.2 oblate

**Author Response: This is a disordered S atom which we couldn't properly refine as split position.**

PLAT213\_ALERT\_2\_B Atom S53' has ADP max/min Ratio ..... 4.2 oblate

**Author Response: This is a disordered S atom which we couldn't properly refine as split position.**

PLAT910\_ALERT\_3\_B Missing # of FCF Reflection(s) Below Theta(Min). 11 Note  
2 0 0, -4 0 1, -2 0 1, 0 0 1, 2 0 1, -4 0 2,  
-2 0 2, 0 0 2, 2 0 2, -2 0 3, 0 0 3,

**Author Response: This is a twinned crystal with a huge cell. Integration was difficult with many reflection overlaps. Overall the data set is 99% complete and the data to parameter ratio is excellent.**

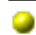

### Alert level C

DIFMN02\_ALERT\_2\_C The minimum difference density is < -0.1\*ZMAX\*0.75  
 \_refine\_diff\_density\_min given = -6.381  
 Test value = -6.150

DIFMN03\_ALERT\_1\_C The minimum difference density is < -0.1\*ZMAX\*0.75  
 The relevant atom site should be identified.

DIFMX02\_ALERT\_1\_C The maximum difference density is > 0.1\*ZMAX\*0.75  
 The relevant atom site should be identified.

PLAT041\_ALERT\_1\_C Calc. and Reported SumFormula Strings Differ Please Check  
 Calc: Ag2.10 As1.45 Cu8 Hg3.06 O2.52 Pb83.55 S261.48  
 Sb111.84 Tl2  
 Rep.: Ag0.50 As0.53 Cu2 Hg0.75 O0 Pb21.23 S65.43 Sb2  
 7.49 Tl0.50

PLAT043\_ALERT\_1\_C Calculated and Reported Mol. Weight Differ by .. 51.02 Check

PLAT051\_ALERT\_1\_C Mu(calc) and Mu(cif) Ratio Differs from 1.0 by . 1.04 %

PLAT068\_ALERT\_1\_C Reported F000 Differs from Calcd (or Missing)... Please Check

PLAT077\_ALERT\_4\_C Unit Cell Contains Non-integer Number of Atoms . Please Check

PLAT084\_ALERT\_3\_C High wR2 Value (i.e. > 0.25) ..... 0.28 Report

PLAT097\_ALERT\_2\_C Large Reported Max. (Positive) Residual Density 6.74 eA-3

PLAT098\_ALERT\_2\_C Large Reported Min. (Negative) Residual Density -6.38 eA-3

PLAT155\_ALERT\_4\_C The Triclinic Unit Cell is NOT Reduced ..... Please Do !

PLAT220\_ALERT\_2\_C NonSolvent Resd 1 S Ueq(max)/Ueq(min) Range 4.1 Ratio

PLAT241\_ALERT\_2\_C High 'MainMol' Ueq as Compared to Neighbors of S64 Check

PLAT242\_ALERT\_2\_C Low 'MainMol' Ueq as Compared to Neighbors of Sb16 Check

PLAT242\_ALERT\_2\_C Low 'MainMol' Ueq as Compared to Neighbors of Sb19 Check

PLAT242\_ALERT\_2\_C Low 'MainMol' Ueq as Compared to Neighbors of S24 Check

PLAT242\_ALERT\_2\_C Low 'MainMol' Ueq as Compared to Neighbors of S42 Check

PLAT242\_ALERT\_2\_C Low 'MainMol' Ueq as Compared to Neighbors of S55 Check

PLAT723\_ALERT\_1\_C Torsion Calc 20.00, Rep 23(22) Dev... 3.00 Sigma

SB23-PB28-ME28-S7 1\_555 1\_555 1\_555 4\_556 # 344 Check

PLAT723\_ALERT\_1\_C Torsion Calc 136.00, Rep 139(21) Dev... 3.00 Sigma

SB23-PB28-ME28-S37 1\_555 1\_555 1\_555 1\_545 # 437 Check

PLAT723\_ALERT\_1\_C Torsion Calc -20.00, Rep -23(22) Dev... 3.00 Sigma

S7 -PB28-ME28-SB23 4\_556 1\_555 1\_555 1\_555 # 443 Check

PLAT723\_ALERT\_1\_C Torsion Calc -136.00, Rep -139(21) Dev... 3.00 Sigma

S37 -PB28-ME28-SB23 1\_545 1\_555 1\_555 1\_555 # 448 Check

PLAT906\_ALERT\_3\_C Large K Value in the Analysis of Variance ..... 9.635 Check

PLAT906\_ALERT\_3\_C Large K Value in the Analysis of Variance ..... 3.526 Check

PLAT911\_ALERT\_3\_C Missing FCF Refl Between Thmin & STh/L= 0.600 235 Report

31 -1 0, 38 -6 0, 40 -6 0, -40 6 1, -32 2 1, -31 1 1,  
 20 0 1, 31 -1 1, 38 -6 1, -40 6 2, -32 0 2, -32 2 2,  
 -31 -1 2, -31 1 2, -30 0 2, -28 0 2, 14 4 2, 20 4 2,  
 30 -2 2, 30 0 2, -40 6 3, -32 0 3, -32 2 3, -31 -1 3,  
 -30 0 3, -28 0 3, -26 0 3, -24 0 3, 12 -4 3, 22 -4 3,  
 30 -2 3, -40 6 4, -33 1 4, -32 0 4, -32 2 4, -31 -1 4,  
 -30 0 4, -28 0 4, -26 0 4, 16 0 4, 22 0 4, 24 6 4,  
 -42 6 5, -34 2 5, -33 1 5, -32 0 5, -31 -1 5, -30 -2 5,  
 -30 0 5, -28 0 5, 20 2 5, 24 6 5, 26 6 5, 28 -2 5,  
 28 0 5, -42 6 6, -33 1 6, -32 0 6, -31 -1 6, -30 -2 6,

```

-30  0  6, -16  0  6, -12  6  6,  4  2  6,  24  6  6,  26  6  6,
 28 -2  6,  30  2  6, -42  6  7, -40  6  7, -33  1  7, -32  0  7,
-31 -1  7, -30 -2  7, -30  0  7, -16  6  7, -14  6  7, -12  6  7,
 22 -2  7,  22  6  7,  24  6  7,  26 -2  7,  26  6  7, -34  0  8,
-33 -1  8, -33  1  8, -32  0  8, -31 -1  8, -30 -2  8,  6 -2  8,
 22  6  8,  26 -2  8,  32 -2  8, -34  0  9, -33 -1  9, -32 -2  9,
PLAT992_ALERT_5_C Repd & Actual _reflns_number_gt Values Differ by      15 Check

```

## Alert level G

FORMU01\_ALERT\_2\_G There is a discrepancy between the atom counts in the  
 \_chemical\_formula\_sum and the formula from the \_atom\_site\* data.  
 Atom count from \_chemical\_formula\_sum: Ag0.5 As0.53 Cu2 Hg0.75 Pb21.23  
 Atom count from the \_atom\_site data: Ag0.525 As0.363 Cu2 Hg0.764 O0.6

CELLZ01\_ALERT\_1\_G Difference between formula and atom\_site contents detected.

CELLZ01\_ALERT\_1\_G ALERT: Large difference may be due to a  
 symmetry error - see SYMMG tests

From the CIF: \_cell\_formula\_units\_Z 4

From the CIF: \_chemical\_formula\_sum Ag0.50 As0.53 Cu2 Hg0.75 O0 Pb21.2

TEST: Compare cell contents of formula and atom\_site data

| atom | Z*formula | cif sites | diff  |
|------|-----------|-----------|-------|
| Ag   | 2.00      | 2.10      | -0.10 |
| As   | 2.12      | 1.45      | 0.67  |
| Cu   | 8.00      | 8.00      | 0.00  |
| Hg   | 3.00      | 3.06      | -0.06 |
| O    | 4.00      | 2.52      | 1.48  |
| Pb   | 84.92     | 83.55     | 1.37  |
| S    | 261.72    | 261.48    | 0.24  |
| Sb   | 109.96    | 111.84    | -1.88 |
| Tl   | 2.00      | 2.00      | 0.00  |

|                   |                                                  |       |           |
|-------------------|--------------------------------------------------|-------|-----------|
| PLAT002_ALERT_2_G | Number of Distance or Angle Restraints on AtSite | 10    | Note      |
| PLAT004_ALERT_5_G | Polymeric Structure Found with Maximum Dimension | 3     | Info      |
| PLAT017_ALERT_1_G | Check Scattering Type Consistency of ME17        | as    | PB        |
| PLAT017_ALERT_1_G | Check Scattering Type Consistency of ME18        | as    | PB        |
| PLAT017_ALERT_1_G | Check Scattering Type Consistency of ME19        | as    | SB        |
| PLAT017_ALERT_1_G | Check Scattering Type Consistency of ME22        | as    | SB        |
| PLAT017_ALERT_1_G | Check Scattering Type Consistency of ME27        | as    | SB        |
| PLAT017_ALERT_1_G | Check Scattering Type Consistency of ME28        | as    | SB        |
| PLAT017_ALERT_1_G | Check Scattering Type Consistency of ME20        | as    | SB        |
| PLAT017_ALERT_1_G | Check Scattering Type Consistency of ME21        | as    | SB        |
| PLAT017_ALERT_1_G | Check Scattering Type Consistency of ME23        | as    | SB        |
| PLAT045_ALERT_1_G | Calculated and Reported Z Differ by a Factor ... | 0.250 | Check     |
| PLAT128_ALERT_4_G | Alternate Setting for Input Space Group C-1      | P-1   | Note      |
| PLAT154_ALERT_1_G | The s.u.'s on the Cell Angles are Equal ..(Note) | 0.002 | Degree    |
| PLAT168_ALERT_4_G | The CIF-Embedded .res File Contains EXYZ Records | 5     | Report    |
| PLAT171_ALERT_4_G | The CIF-Embedded .res File Contains EADP Records | 16    | Report    |
| PLAT172_ALERT_4_G | The CIF-Embedded .res File Contains DFIX Records | 4     | Report    |
| PLAT299_ALERT_4_G | Atom Site Occupancy Constrained at .....         | 0.5   | Check     |
|                   | Pb12 Tl12                                        |       |           |
| PLAT301_ALERT_3_G | Main Residue Disorder .....(Resd 1)              | 14%   | Note      |
| PLAT720_ALERT_4_G | Number of Unusual/Non-Standard Labels .....      | 9     | Note      |
|                   | Me17 Me18 Me19 Me22 Me27 Me28 Me20 Me21 Me23     |       |           |
| PLAT794_ALERT_5_G | Tentative Bond Valency for Pb5 (II)              | .     | 1.98 Info |
| PLAT794_ALERT_5_G | Tentative Bond Valency for Pb7 (II)              | .     | 2.00 Info |
| PLAT794_ALERT_5_G | Tentative Bond Valency for Pb8 (II)              | .     | 1.96 Info |

PLAT794\_ALERT\_5\_G Tentative Bond Valency for Pb9 (II) . 1.81 Info  
 PLAT794\_ALERT\_5\_G Tentative Bond Valency for Pb10 (II) . 1.82 Info  
 PLAT794\_ALERT\_5\_G Tentative Bond Valency for Pb11 (II) . 1.96 Info  
 PLAT794\_ALERT\_5\_G Tentative Bond Valency for Pb13 (II) . 1.88 Info  
 PLAT794\_ALERT\_5\_G Tentative Bond Valency for Pb14 (II) . 2.06 Info  
 PLAT794\_ALERT\_5\_G Tentative Bond Valency for Pb15 (II) . 1.82 Info  
 PLAT794\_ALERT\_5\_G Tentative Bond Valency for Pb16 (II) . 1.79 Info  
 PLAT794\_ALERT\_5\_G Tentative Bond Valency for Sb1 (III) . 3.07 Info  
 PLAT794\_ALERT\_5\_G Tentative Bond Valency for Sb4 (III) . 3.40 Info  
 PLAT794\_ALERT\_5\_G Tentative Bond Valency for Sb5 (III) . 2.99 Info  
 PLAT794\_ALERT\_5\_G Tentative Bond Valency for Sb7 (III) . 2.91 Info  
 PLAT794\_ALERT\_5\_G Tentative Bond Valency for Sb8 (III) . 2.69 Info  
 PLAT794\_ALERT\_5\_G Tentative Bond Valency for Sb10 (III) . 3.18 Info  
 PLAT794\_ALERT\_5\_G Tentative Bond Valency for Sb11 (III) . 3.08 Info  
 PLAT794\_ALERT\_5\_G Tentative Bond Valency for Sb12 (III) . 2.90 Info  
 PLAT794\_ALERT\_5\_G Tentative Bond Valency for Sb13 (III) . 2.45 Info  
 PLAT794\_ALERT\_5\_G Tentative Bond Valency for Sb14 (III) . 3.08 Info  
 PLAT794\_ALERT\_5\_G Tentative Bond Valency for Sb15 (III) . 2.66 Info  
 PLAT794\_ALERT\_5\_G Tentative Bond Valency for Sb17 (III) . 3.18 Info  
 PLAT794\_ALERT\_5\_G Tentative Bond Valency for Sb18 (III) . 2.83 Info  
 PLAT794\_ALERT\_5\_G Tentative Bond Valency for Sb25 (III) . 2.45 Info  
 PLAT794\_ALERT\_5\_G Tentative Bond Valency for Sb26 (III) . 2.73 Info  
 PLAT860\_ALERT\_3\_G Number of Least-Squares Restraints ..... 8 Note  
 PLAT870\_ALERT\_4\_G ALERTS Related to Twinning Effects Suppressed .. ! Info  
 PLAT883\_ALERT\_1\_G Absent Datum for \_atom\_sites\_solution\_primary .. Please Do !  
 PLAT908\_ALERT\_2\_G Max. Perc. Data with I > 2\*s(I) per Res.Shell . 66.36% Note  
 PLAT912\_ALERT\_4\_G Missing # of FCF Reflections Above STh/L= 0.600 2957 Note  
 PLAT931\_ALERT\_5\_G CIFcalcFCF Twin Law ( 1-2 1) Est.d BASF 0.53 Check  
 PLAT931\_ALERT\_5\_G CIFcalcFCF Twin Law [ 0-1 0] Est.d BASF 0.47 Check  
 PLAT933\_ALERT\_2\_G Number of HKL-OMIT Records in Embedded .res File 52 Note  
 -38 -2 1, -28 4 2, -26 -2 19, -26 0 4, -24 4 22, -22 0 24,  
 -18 -4 1, -18 2 9, -18 2 10, -16 -2 11, -16 -2 12, -16 0 6,  
 -16 0 12, -16 0 27, -16 2 10, -14 -2 13, -12 2 15, -12 2 26,  
 -10 -2 1, -10 -2 17, -10 -2 28, -10 2 25, -8 -4 1, -8 -2 27,  
 -8 4 15, -8 4 16, -6 0 17, -6 0 26, -4 -4 19, -4 -4 20,  
 2 0 11, 4 2 6, 6 -2 8, 10 -2 22, 10 0 21, 12 -4 3,  
 12 -2 1, 12 0 10, 12 0 14, 14 -4 10, 14 4 2, 16 0 4,  
 18 -4 6, 20 0 1, 20 2 5, 20 4 2, 22 -4 3, 22 -2 7,  
 22 0 4, 26 0 15,  
 PLAT941\_ALERT\_3\_G Average HKL Measurement Multiplicity ..... 1.5 Low  
 PLAT969\_ALERT\_5\_G The 'Henn et al.' R-Factor-gap value ..... 2.892 Note  
 Predicted wR2: Based on SigI\*\*2 9.53 or SHELX Weight 28.97

---

0 **ALERT level A** = Most likely a serious problem - resolve or explain  
 7 **ALERT level B** = A potentially serious problem, consider carefully  
 27 **ALERT level C** = Check. Ensure it is not caused by an omission or oversight  
 58 **ALERT level G** = General information/check it is not something unexpected

24 ALERT type 1 CIF construction/syntax error, inconsistent or missing data  
 20 ALERT type 2 Indicator that the structure model may be wrong or deficient  
 8 ALERT type 3 Indicator that the structure quality may be low  
 10 ALERT type 4 Improvement, methodology, query or suggestion  
 30 ALERT type 5 Informative message, check

---

It is advisable to attempt to resolve as many as possible of the alerts in all categories. Often the minor alerts point to easily fixed oversights, errors and omissions in your CIF or refinement strategy, so attention to these fine details can be worthwhile. In order to resolve some of the more serious problems it may be necessary to carry out additional measurements or structure refinements. However, the purpose of your study may justify the reported deviations and the more serious of these should normally be commented upon in the discussion or experimental section of a paper or in the "special\_details" fields of the CIF. checkCIF was carefully designed to identify outliers and unusual parameters, but every test has its limitations and alerts that are not important in a particular case may appear. Conversely, the absence of alerts does not guarantee there are no aspects of the results needing attention. It is up to the individual to critically assess their own results and, if necessary, seek expert advice.

### **Publication of your CIF in IUCr journals**

A basic structural check has been run on your CIF. These basic checks will be run on all CIFs submitted for publication in IUCr journals (*Acta Crystallographica*, *Journal of Applied Crystallography*, *Journal of Synchrotron Radiation*); however, if you intend to submit to *Acta Crystallographica Section C* or *E* or *IUCrData*, you should make sure that full publication checks are run on the final version of your CIF prior to submission.

### **Publication of your CIF in other journals**

Please refer to the *Notes for Authors* of the relevant journal for any special instructions relating to CIF submission.

Datablock rouxelite\_full\_o - ellipsoid plot

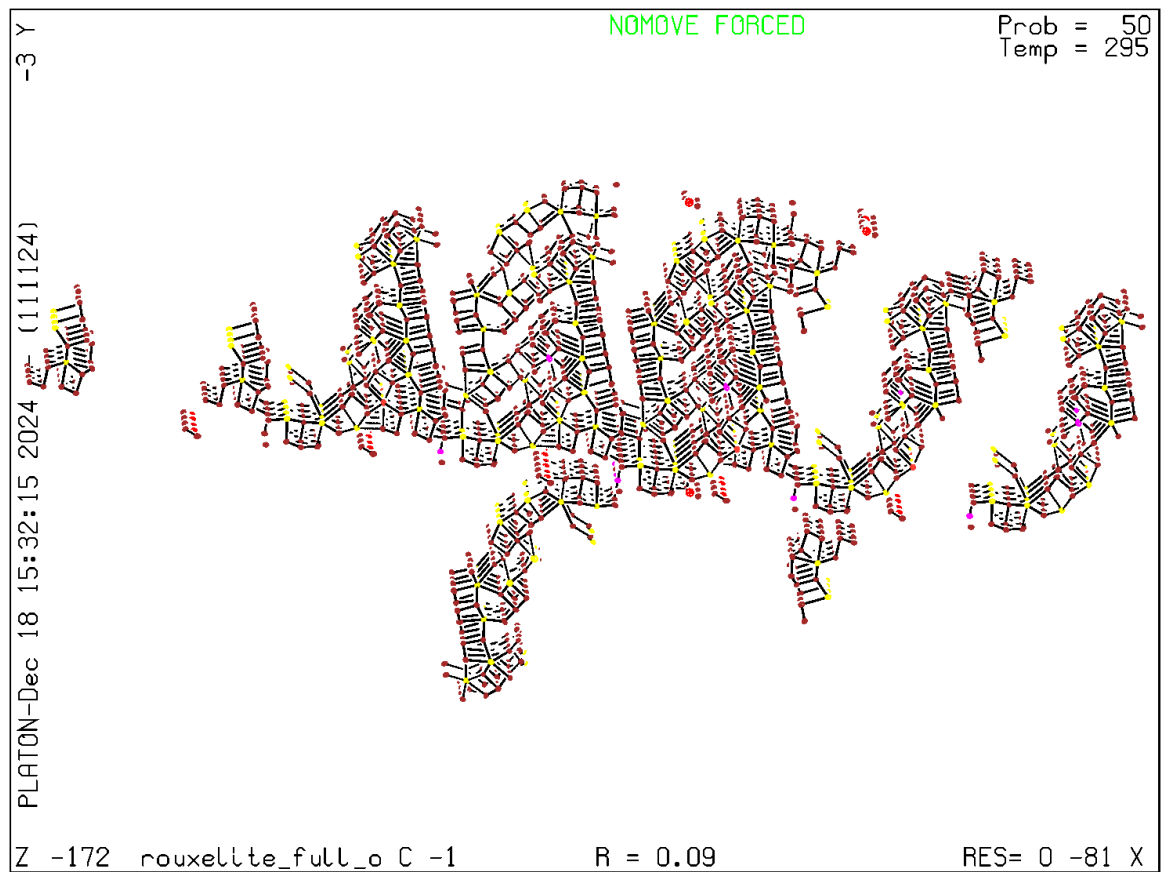

Supplement: Supplementary file 2 [file ejm-37-591-2025-supplement.zip]
