# Supplementary material for: The 8 Å crystal structure and new crystal chemical data of rouxelite from the Monte Arsiccio mine, Apuan Alps, Italy
Source: Copernicus journal article supplement (doi:10.5194/ejm-37-591-2025), 2025-09-08

## checkCIF/PLATON report

Structure factors have been supplied for datablock(s) rouxelite\_no\_o

THIS REPORT IS FOR GUIDANCE ONLY. IF USED AS PART OF A REVIEW PROCEDURE FOR PUBLICATION, IT SHOULD NOT REPLACE THE EXPERTISE OF AN EXPERIENCED CRYSTALLOGRAPHIC REFEREE.

No syntax errors found.      CIF dictionary      Interpreting this report

### Datablock: rouxelite\_no\_o

---

|                 |                                                              |                                                                 |
|-----------------|--------------------------------------------------------------|-----------------------------------------------------------------|
| Bond precision: | Cu- S = 0.0106 Å                                             | Wavelength=0.71073                                              |
| Cell:           | a=43.1883 (12)      b=8.1037 (2)      c=38.147 (1)           |                                                                 |
|                 | alpha=96.001 (2)      beta=116.615 (2)      gamma=95.372 (2) |                                                                 |
| Temperature:    | 295 K                                                        |                                                                 |
|                 | Calculated                                                   | Reported                                                        |
| Volume          | 11721.7 (6)                                                  | 11721.7 (6)                                                     |
| Space group     | C -1                                                         | C -1                                                            |
| Hall group      | -C 1                                                         | -C 1                                                            |
| Moiety formula  | Ag2.08 As1.45 Cu8 Hg3.07<br>Pb83.57 S261.52 Sb111.84<br>Tl2  | ?                                                               |
| Sum formula     | Ag2.08 As1.45 Cu8 Hg3.07<br>Pb83.57 S261.52 Sb111.84<br>Tl2  | Ag0.50 As0.53 Cu2 Hg0.75 O0<br>Pb21.23 S65.43 Sb27.49<br>Tl0.50 |
| Mr              | 41182.06                                                     | 10317.25                                                        |
| Dx, g cm-3      | 5.834                                                        | 5.846                                                           |
| Z               | 1                                                            | 4                                                               |
| Mu (mm-1)       | 39.599                                                       | 40.004                                                          |
| F000            | 17525.5                                                      | 17558.0                                                         |
| F000'           | 17227.68                                                     |                                                                 |
| h, k, lmax      | 64, 12, 57                                                   | 64, 12, 57                                                      |
| Nref            | 41276                                                        | 55765                                                           |
| Tmin, Tmax      | 0.246, 0.670                                                 | 0.057, 0.069                                                    |
| Tmin'           | 0.087                                                        |                                                                 |

Correction method= # Reported T Limits: Tmin=0.057 Tmax=0.069  
AbsCorr = MULTI-SCAN

Data completeness= 1.351      Theta (max)= 32.173

R(reflections)= 0.0855( 17982)

wR2(reflections)=  
0.2767( 55765)

S = 0.947

Npar= 1122

---

The following ALERTS were generated. Each ALERT has the format  
**test-name\_ALERT\_alert-type\_alert-level.**  
Click on the hyperlinks for more details of the test.

---

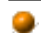

#### Alert level B

PLAT213\_ALERT\_2\_B Atom S51 has ADP max/min Ratio ..... 4.2 oblate

**Author Response: This is a disordered S atom which we couldn't properly refine as split position.**

PLAT213\_ALERT\_2\_B Atom S53 has ADP max/min Ratio ..... 4.2 oblate

**Author Response: This is a disordered S atom which we couldn't properly refine as split position.**

PLAT213\_ALERT\_2\_B Atom S51' has ADP max/min Ratio ..... 4.2 oblate

**Author Response: This is a disordered S atom which we couldn't properly refine as split position.**

PLAT213\_ALERT\_2\_B Atom S53' has ADP max/min Ratio ..... 4.2 oblate

**Author Response: This is a disordered S atom which we couldn't properly refine as split position.**

PLAT910\_ALERT\_3\_B Missing # of FCF Reflection(s) Below Theta(Min). 11 Note  
2 0 0, -4 0 1, -2 0 1, 0 0 1, 2 0 1, -4 0 2,  
-2 0 2, 0 0 2, 2 0 2, -2 0 3, 0 0 3,

**Author Response: This is a twinned crystal with a huge cell. Integration was difficult with many reflection overlaps. Overall the data set is 99% complete and the data to parameter ratio is excellent.**

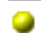

#### Alert level C

DIFMN02\_ALERT\_2\_C The minimum difference density is < -0.1\*ZMAX\*0.75  
\_refine\_diff\_density\_min given = -6.366  
Test value = -6.150

DIFMN03\_ALERT\_1\_C The minimum difference density is < -0.1\*ZMAX\*0.75  
The relevant atom site should be identified.

DIFMX02\_ALERT\_1\_C The maximum difference density is > 0.1\*ZMAX\*0.75

The relevant atom site should be identified.

|                   |                                                                 |              |
|-------------------|-----------------------------------------------------------------|--------------|
| PLAT041_ALERT_1_C | Calc. and Reported SumFormula Strings Differ                    | Please Check |
|                   | Calc: Ag2.08 As1.45 Cu8 Hg3.07 Pb83.57 S261.52 Sb111.84 Tl2     |              |
|                   | Rep.: Ag0.50 As0.53 Cu2 Hg0.75 O0 Pb21.23 S65.43 Sb27.49 Tl0.50 |              |
| PLAT043_ALERT_1_C | Calculated and Reported Mol. Weight Differ by ..                | 86.94 Check  |
| PLAT051_ALERT_1_C | Mu(calc) and Mu(cif) Ratio Differs from 1.0 by ..               | 1.01 %       |
| PLAT068_ALERT_1_C | Reported F000 Differs from Calcd (or Missing)...                | Please Check |
| PLAT077_ALERT_4_C | Unit Cell Contains Non-integer Number of Atoms ..               | Please Check |
| PLAT084_ALERT_3_C | High wR2 Value (i.e. > 0.25) .....                              | 0.28 Report  |
| PLAT097_ALERT_2_C | Large Reported Max. (Positive) Residual Density                 | 6.71 eA-3    |
| PLAT098_ALERT_2_C | Large Reported Min. (Negative) Residual Density                 | -6.37 eA-3   |
| PLAT155_ALERT_4_C | The Triclinic Unit Cell is NOT Reduced .....                    | Please Do !  |
| PLAT213_ALERT_2_C | Atom S65 has ADP max/min Ratio .....                            | 3.9 prolat   |

**Author Response: This is a disordered S atom which we couldn't properly refine as split position.**

|                   |          |                             |            |
|-------------------|----------|-----------------------------|------------|
| PLAT213_ALERT_2_C | Atom S66 | has ADP max/min Ratio ..... | 3.9 prolat |
|-------------------|----------|-----------------------------|------------|

**Author Response: This is a disordered S atom which we couldn't properly refine as split position.**

|                   |                                                         |              |                                 |                   |       |       |        |
|-------------------|---------------------------------------------------------|--------------|---------------------------------|-------------------|-------|-------|--------|
| PLAT220_ALERT_2_C | NonSolvent                                              | Resd 1       | S                               | Ueq(max)/Ueq(min) | Range | 3.9   | Ratio  |
| PLAT241_ALERT_2_C | High                                                    | 'MainMol'    | Ueq as Compared to Neighbors of |                   |       | S64   | Check  |
| PLAT242_ALERT_2_C | Low                                                     | 'MainMol'    | Ueq as Compared to Neighbors of |                   |       | Sb19  | Check  |
| PLAT242_ALERT_2_C | Low                                                     | 'MainMol'    | Ueq as Compared to Neighbors of |                   |       | S24   | Check  |
| PLAT242_ALERT_2_C | Low                                                     | 'MainMol'    | Ueq as Compared to Neighbors of |                   |       | S42   | Check  |
| PLAT242_ALERT_2_C | Low                                                     | 'MainMol'    | Ueq as Compared to Neighbors of |                   |       | S55   | Check  |
| PLAT723_ALERT_1_C | Torsion Calc                                            | 19.00, Rep   | 23(22) Dev...                   |                   |       | 4.00  | Sigma  |
|                   | SB23-PB28-ME28-S7                                       | 1_555 1_555  | 1_555 4_556                     | #                 | 344   | Check |        |
| PLAT723_ALERT_1_C | Torsion Calc                                            | 136.00, Rep  | 139(21) Dev...                  |                   |       | 3.00  | Sigma  |
|                   | SB23-PB28-ME28-S37                                      | 1_555 1_555  | 1_555 1_545                     | #                 | 437   | Check |        |
| PLAT723_ALERT_1_C | Torsion Calc                                            | -19.00, Rep  | -23(22) Dev...                  |                   |       | 4.00  | Sigma  |
|                   | S7 -PB28-ME28-SB23                                      | 4_556 1_555  | 1_555 1_555                     | #                 | 443   | Check |        |
| PLAT723_ALERT_1_C | Torsion Calc                                            | -136.00, Rep | -139(21) Dev...                 |                   |       | 3.00  | Sigma  |
|                   | S37 -PB28-ME28-SB23                                     | 1_545 1_555  | 1_555 1_555                     | #                 | 448   | Check |        |
| PLAT906_ALERT_3_C | Large K Value in the Analysis of Variance .....         |              |                                 |                   |       | 9.676 | Check  |
| PLAT906_ALERT_3_C | Large K Value in the Analysis of Variance .....         |              |                                 |                   |       | 3.395 | Check  |
| PLAT911_ALERT_3_C | Missing FCF Refl Between Thmin & STh/L=                 | 0.600        |                                 |                   |       | 235   | Report |
|                   | 31 -1 0, 38 -6 0, 40 -6 0, -40 6 1, -32 2 1, -31 1 1,   |              |                                 |                   |       |       |        |
|                   | 20 0 1, 31 -1 1, 38 -6 1, -40 6 2, -32 0 2, -32 2 2,    |              |                                 |                   |       |       |        |
|                   | -31 -1 2, -31 1 2, -30 0 2, -28 0 2, 14 4 2, 20 4 2,    |              |                                 |                   |       |       |        |
|                   | 30 -2 2, 30 0 2, -40 6 3, -32 0 3, -32 2 3, -31 -1 3,   |              |                                 |                   |       |       |        |
|                   | -30 0 3, -28 0 3, -26 0 3, -24 0 3, 12 -4 3, 22 -4 3,   |              |                                 |                   |       |       |        |
|                   | 30 -2 3, -40 6 4, -33 1 4, -32 0 4, -32 2 4, -31 -1 4,  |              |                                 |                   |       |       |        |
|                   | -30 0 4, -28 0 4, -26 0 4, 16 0 4, 22 0 4, 24 6 4,      |              |                                 |                   |       |       |        |
|                   | -42 6 5, -34 2 5, -33 1 5, -32 0 5, -31 -1 5, -30 -2 5, |              |                                 |                   |       |       |        |
|                   | -30 0 5, -28 0 5, 20 2 5, 24 6 5, 26 6 5, 28 -2 5,      |              |                                 |                   |       |       |        |
|                   | 28 0 5, -42 6 6, -33 1 6, -32 0 6, -31 -1 6, -30 -2 6,  |              |                                 |                   |       |       |        |
|                   | -30 0 6, -16 0 6, -12 6 6, 4 2 6, 24 6 6, 26 6 6,       |              |                                 |                   |       |       |        |
|                   | 28 -2 6, 30 2 6, -42 6 7, -40 6 7, -33 1 7, -32 0 7,    |              |                                 |                   |       |       |        |
|                   | -31 -1 7, -30 -2 7, -30 0 7, -16 6 7, -14 6 7, -12 6 7, |              |                                 |                   |       |       |        |

```

      22 -2  7,  22  6  7,  24  6  7,  26 -2  7,  26  6  7, -34  0  8,
     -33 -1  8, -33  1  8, -32  0  8, -31 -1  8, -30 -2  8,   6 -2  8,
      22  6  8,  26 -2  8,  32 -2  8, -34  0  9, -33 -1  9, -32 -2  9,
PLAT992_ALERT_5_C Repd & Actual _reflns_number_gt Values Differ by      16 Check

```

## Alert level G

FORMU01\_ALERT\_2\_G There is a discrepancy between the atom counts in the  
     \_chemical\_formula\_sum and the formula from the \_atom\_site\* data.  
     Atom count from \_chemical\_formula\_sum: Ag0.5 As0.53 Cu2 Hg0.75 Pb21.23  
     Atom count from the \_atom\_site data: Ag0.52 As0.362 Cu2 Hg0.767 Pb20.  
 CELLZ01\_ALERT\_1\_G Difference between formula and atom\_site contents detected.  
 CELLZ01\_ALERT\_1\_G ALERT: Large difference may be due to a  
     symmetry error - see SYMMG tests  
     From the CIF: \_cell\_formula\_units\_Z      4  
     From the CIF: \_chemical\_formula\_sum Ag0.50 As0.53 Cu2 Hg0.75 O0 Pb21.2  
     TEST: Compare cell contents of formula and atom\_site data

| atom | Z*formula | cif sites | diff  |
|------|-----------|-----------|-------|
| Ag   | 2.00      | 2.08      | -0.08 |
| As   | 2.12      | 1.45      | 0.67  |
| Cu   | 8.00      | 8.00      | 0.00  |
| Hg   | 3.00      | 3.07      | -0.07 |
| O    | 4.00      | 0.00      | 4.00  |
| Pb   | 84.92     | 83.57     | 1.35  |
| S    | 261.72    | 261.52    | 0.20  |
| Sb   | 109.96    | 111.84    | -1.88 |
| Tl   | 2.00      | 2.00      | 0.00  |

|                   |                                                  |       |           |
|-------------------|--------------------------------------------------|-------|-----------|
| PLAT002_ALERT_2_G | Number of Distance or Angle Restraints on AtSite | 6     | Note      |
| PLAT004_ALERT_5_G | Polymeric Structure Found with Maximum Dimension | 3     | Info      |
| PLAT017_ALERT_1_G | Check Scattering Type Consistency of ME17        | as    | PB        |
| PLAT017_ALERT_1_G | Check Scattering Type Consistency of ME18        | as    | PB        |
| PLAT017_ALERT_1_G | Check Scattering Type Consistency of ME19        | as    | SB        |
| PLAT017_ALERT_1_G | Check Scattering Type Consistency of ME22        | as    | SB        |
| PLAT017_ALERT_1_G | Check Scattering Type Consistency of ME27        | as    | SB        |
| PLAT017_ALERT_1_G | Check Scattering Type Consistency of ME28        | as    | SB        |
| PLAT017_ALERT_1_G | Check Scattering Type Consistency of ME20        | as    | SB        |
| PLAT017_ALERT_1_G | Check Scattering Type Consistency of ME21        | as    | SB        |
| PLAT017_ALERT_1_G | Check Scattering Type Consistency of ME23        | as    | SB        |
| PLAT045_ALERT_1_G | Calculated and Reported Z Differ by a Factor ... | 0.250 | Check     |
| PLAT128_ALERT_4_G | Alternate Setting for Input Space Group C-1      | P-1   | Note      |
| PLAT154_ALERT_1_G | The s.u.'s on the Cell Angles are Equal ..(Note) | 0.002 | Degree    |
| PLAT168_ALERT_4_G | The CIF-Embedded .res File Contains EXYZ Records | 5     | Report    |
| PLAT171_ALERT_4_G | The CIF-Embedded .res File Contains EADP Records | 16    | Report    |
| PLAT172_ALERT_4_G | The CIF-Embedded .res File Contains DFIX Records | 2     | Report    |
| PLAT299_ALERT_4_G | Atom Site Occupancy Constrained at .....         | 0.5   | Check     |
|                   | Pb12 Tl12                                        |       |           |
| PLAT301_ALERT_3_G | Main Residue Disorder .....(Resd 1)              | 14%   | Note      |
| PLAT720_ALERT_4_G | Number of Unusual/Non-Standard Labels .....      | 9     | Note      |
|                   | Me17 Me18 Me19 Me22 Me27 Me28 Me20 Me21          |       |           |
|                   | Me23                                             |       |           |
| PLAT794_ALERT_5_G | Tentative Bond Valency for Pb5                   | (II)  | 1.98 Info |
| PLAT794_ALERT_5_G | Tentative Bond Valency for Pb7                   | (II)  | 2.01 Info |
| PLAT794_ALERT_5_G | Tentative Bond Valency for Pb8                   | (II)  | 1.96 Info |
| PLAT794_ALERT_5_G | Tentative Bond Valency for Pb9                   | (II)  | 1.81 Info |
| PLAT794_ALERT_5_G | Tentative Bond Valency for Pb10                  | (II)  | 1.82 Info |
| PLAT794_ALERT_5_G | Tentative Bond Valency for Pb11                  | (II)  | 1.96 Info |

|                   |                                                              |       |   |             |       |
|-------------------|--------------------------------------------------------------|-------|---|-------------|-------|
| PLAT794_ALERT_5_G | Tentative Bond Valency for Pb13                              | (II)  | . | 1.88        | Info  |
| PLAT794_ALERT_5_G | Tentative Bond Valency for Pb14                              | (II)  | . | 2.05        | Info  |
| PLAT794_ALERT_5_G | Tentative Bond Valency for Pb15                              | (II)  | . | 1.82        | Info  |
| PLAT794_ALERT_5_G | Tentative Bond Valency for Pb16                              | (II)  | . | 1.79        | Info  |
| PLAT794_ALERT_5_G | Tentative Bond Valency for Sb1                               | (III) | . | 3.06        | Info  |
| PLAT794_ALERT_5_G | Tentative Bond Valency for Sb4                               | (III) | . | 3.40        | Info  |
| PLAT794_ALERT_5_G | Tentative Bond Valency for Sb5                               | (III) | . | 3.00        | Info  |
| PLAT794_ALERT_5_G | Tentative Bond Valency for Sb7                               | (III) | . | 2.91        | Info  |
| PLAT794_ALERT_5_G | Tentative Bond Valency for Sb8                               | (III) | . | 2.68        | Info  |
| PLAT794_ALERT_5_G | Tentative Bond Valency for Sb10                              | (III) | . | 3.18        | Info  |
| PLAT794_ALERT_5_G | Tentative Bond Valency for Sb11                              | (III) | . | 3.09        | Info  |
| PLAT794_ALERT_5_G | Tentative Bond Valency for Sb12                              | (III) | . | 2.89        | Info  |
| PLAT794_ALERT_5_G | Tentative Bond Valency for Sb13                              | (III) | . | 2.44        | Info  |
| PLAT794_ALERT_5_G | Tentative Bond Valency for Sb14                              | (III) | . | 3.08        | Info  |
| PLAT794_ALERT_5_G | Tentative Bond Valency for Sb15                              | (III) | . | 2.66        | Info  |
| PLAT794_ALERT_5_G | Tentative Bond Valency for Sb17                              | (III) | . | 3.19        | Info  |
| PLAT794_ALERT_5_G | Tentative Bond Valency for Sb18                              | (III) | . | 2.83        | Info  |
| PLAT794_ALERT_5_G | Tentative Bond Valency for Sb25                              | (III) | . | 2.45        | Info  |
| PLAT794_ALERT_5_G | Tentative Bond Valency for Sb26                              | (III) | . | 2.73        | Info  |
| PLAT860_ALERT_3_G | Number of Least-Squares Restraints .....                     |       |   | 4           | Note  |
| PLAT870_ALERT_4_G | ALERTS Related to Twinning Effects Suppressed ..             |       |   | !           | Info  |
| PLAT883_ALERT_1_G | Absent Datum for _atom_sites_solution_primary ..             |       |   | Please Do ! |       |
| PLAT908_ALERT_2_G | Max. Perc. Data with I > 2*s(I) per Res.Shell .              |       |   | 66.39%      | Note  |
| PLAT912_ALERT_4_G | Missing # of FCF Reflections Above STh/L= 0.600              |       |   | 2957        | Note  |
| PLAT931_ALERT_5_G | CIFcalcFCF Twin Law ( 1-2 1) Est.d BASF                      |       |   | 0.53        | Check |
| PLAT933_ALERT_2_G | Number of HKL-OMIT Records in Embedded .res File             |       |   | 52          | Note  |
|                   | -38 -2 1, -28 4 2, -26 -2 19, -26 0 4, -24 4 22, -22 0 24,   |       |   |             |       |
|                   | -18 -4 1, -18 2 9, -18 2 10, -16 -2 11, -16 -2 12, -16 0 6,  |       |   |             |       |
|                   | -16 0 12, -16 0 27, -16 2 10, -14 -2 13, -12 2 15, -12 2 26, |       |   |             |       |
|                   | -10 -2 1, -10 -2 17, -10 -2 28, -10 2 25, -8 -4 1, -8 -2 27, |       |   |             |       |
|                   | -8 4 15, -8 4 16, -6 0 17, -6 0 26, -4 -4 19, -4 -4 20,      |       |   |             |       |
|                   | 2 0 11, 4 2 6, 6 -2 8, 10 -2 22, 10 0 21, 12 -4 3,           |       |   |             |       |
|                   | 12 -2 1, 12 0 10, 12 0 14, 14 -4 10, 14 4 2, 16 0 4,         |       |   |             |       |
|                   | 18 -4 6, 20 0 1, 20 2 5, 20 4 2, 22 -4 3, 22 -2 7,           |       |   |             |       |
|                   | 22 0 4, 26 0 15,                                             |       |   |             |       |
| PLAT941_ALERT_3_G | Average HKL Measurement Multiplicity .....                   |       |   | 1.5         | Low   |
| PLAT969_ALERT_5_G | The 'Henn et al.' R-Factor-gap value .....                   |       |   | 2.904       | Note  |
|                   | Predicted wR2: Based on SigI**2 9.53 or SHELX Weight 29.21   |       |   |             |       |

---

0 **ALERT level A** = Most likely a serious problem - resolve or explain  
 5 **ALERT level B** = A potentially serious problem, consider carefully  
 28 **ALERT level C** = Check. Ensure it is not caused by an omission or oversight  
 57 **ALERT level G** = General information/check it is not something unexpected

24 ALERT type 1 CIF construction/syntax error, inconsistent or missing data  
 19 ALERT type 2 Indicator that the structure model may be wrong or deficient  
 8 ALERT type 3 Indicator that the structure quality may be low  
 10 ALERT type 4 Improvement, methodology, query or suggestion  
 29 ALERT type 5 Informative message, check

---

It is advisable to attempt to resolve as many as possible of the alerts in all categories. Often the minor alerts point to easily fixed oversights, errors and omissions in your CIF or refinement strategy, so attention to these fine details can be worthwhile. In order to resolve some of the more serious problems it may be necessary to carry out additional measurements or structure refinements. However, the purpose of your study may justify the reported deviations and the more serious of these should normally be commented upon in the discussion or experimental section of a paper or in the "special\_details" fields of the CIF. checkCIF was carefully designed to identify outliers and unusual parameters, but every test has its limitations and alerts that are not important in a particular case may appear. Conversely, the absence of alerts does not guarantee there are no aspects of the results needing attention. It is up to the individual to critically assess their own results and, if necessary, seek expert advice.

### **Publication of your CIF in IUCr journals**

A basic structural check has been run on your CIF. These basic checks will be run on all CIFs submitted for publication in IUCr journals (*Acta Crystallographica*, *Journal of Applied Crystallography*, *Journal of Synchrotron Radiation*); however, if you intend to submit to *Acta Crystallographica Section C* or *E* or *IUCrData*, you should make sure that full publication checks are run on the final version of your CIF prior to submission.

### **Publication of your CIF in other journals**

Please refer to the *Notes for Authors* of the relevant journal for any special instructions relating to CIF submission.

Datablock rouxelite\_no\_o - ellipsoid plot

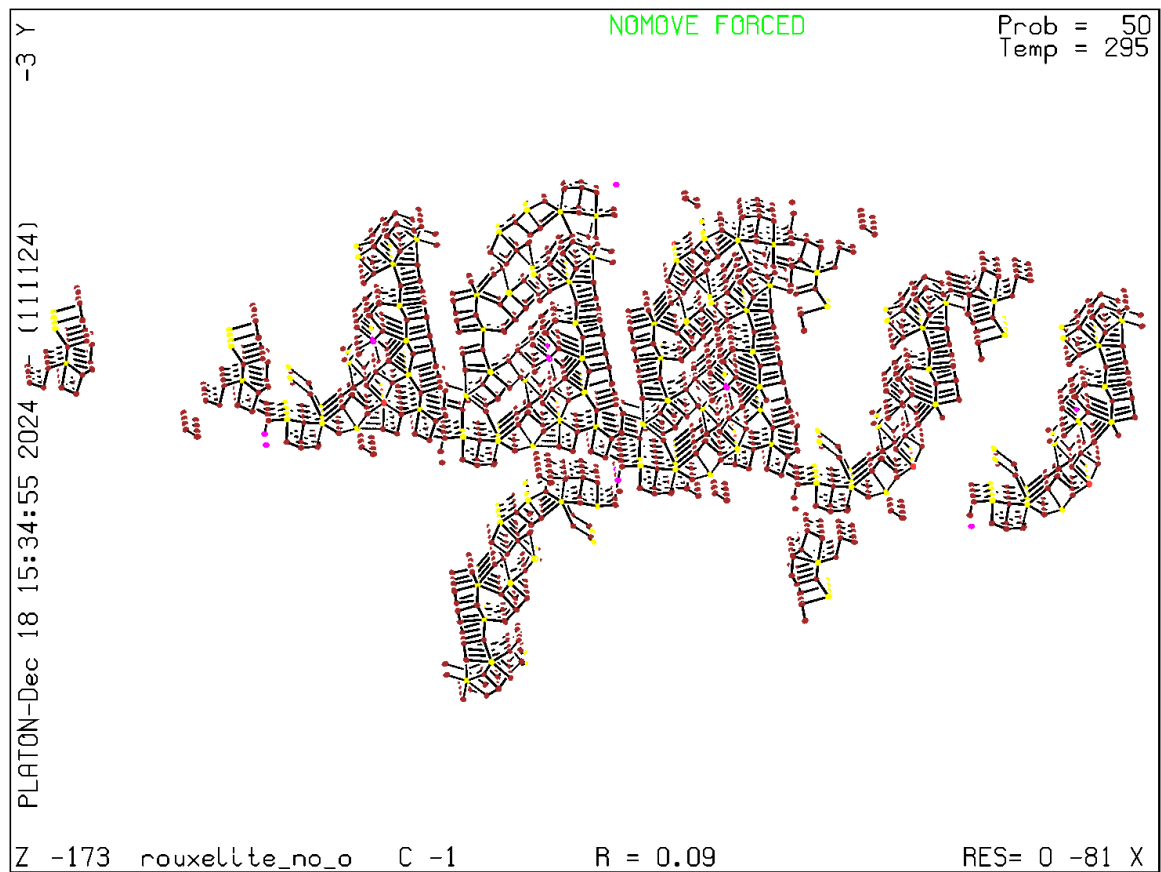

Supplement: Supplementary file 3 [file ejm-37-591-2025-supplement.zip]
