# Supplementary material for: The 8 Å crystal structure and new crystal chemical data of rouxelite from the Monte Arsiccio mine, Apuan Alps, Italy
Source: Copernicus journal article supplement (doi:10.5194/ejm-37-591-2025), 2025-09-08
Supplement: Supplementary file 4 [file ejm-37-591-2025-supplement.zip]

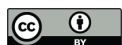

## *Supplement of*

# **The 8 Å crystal structure and new crystal chemical data of rouxelite from the Monte Arsiccio mine, Apuan Alps, Italy**

**Dan Topa et al.**

*Correspondence to:* Dan Topa ([dan.topa@nhm-wien.ac.at](mailto:dan.topa@nhm-wien.ac.at))

- [ejm-37-591-2025-supplement-title-page.pdf](#)
- [S1 rouxelite\\_no\\_o.cif](#)
- [S1a checkcif\\_no\\_o.pdf](#)
- [S2 rouxelite\\_full\\_o.cif](#)
- [S2a checkcif\\_free\\_o.pdf](#)
- [S3 rouxelite\\_free\\_o.cif](#)
- [S3a checkcif\\_full\\_o.pdf](#)
- [Table S1 roux CD\\_BVS.docx](#)
- [Table S2 roux PC.docx](#)

The copyright of individual parts of the supplement might differ from the article licence.
